# Supplementary material
Source: PubMed Central journal article supplement (PMC3837377)
Supplement: cn4001445_si_001.pdf [file cn4001445_si_001.pdf]

## Supporting Information

The effects of Zn<sup>2+</sup> binding on the structural and dynamic properties of amyloid  $\beta$  peptide associated with Alzheimer's disease: Asp<sup>1</sup> or Glu<sup>11</sup>?

Liang Xu<sup>1,2,\*</sup>, Xiaojuan Wang<sup>3</sup>, Xicheng Wang<sup>4</sup>

<sup>1</sup>School of Chemistry, Dalian University of Technology, Dalian 116023, China.

<sup>2</sup>State Key Laboratory of Fine Chemicals, Dalian University of Technology, Dalian 116023, China.

<sup>3</sup>School of Chemical Machinery, Dalian University of Technology, Dalian 116023, China.

<sup>4</sup>Department of Engineering Mechanics, State Key Laboratory of Structural Analyses for Industrial Equipment, Dalian University of Technology, Dalian 116023, China.

Corresponding author E-mail: xuliang@dlut.edu.cn.

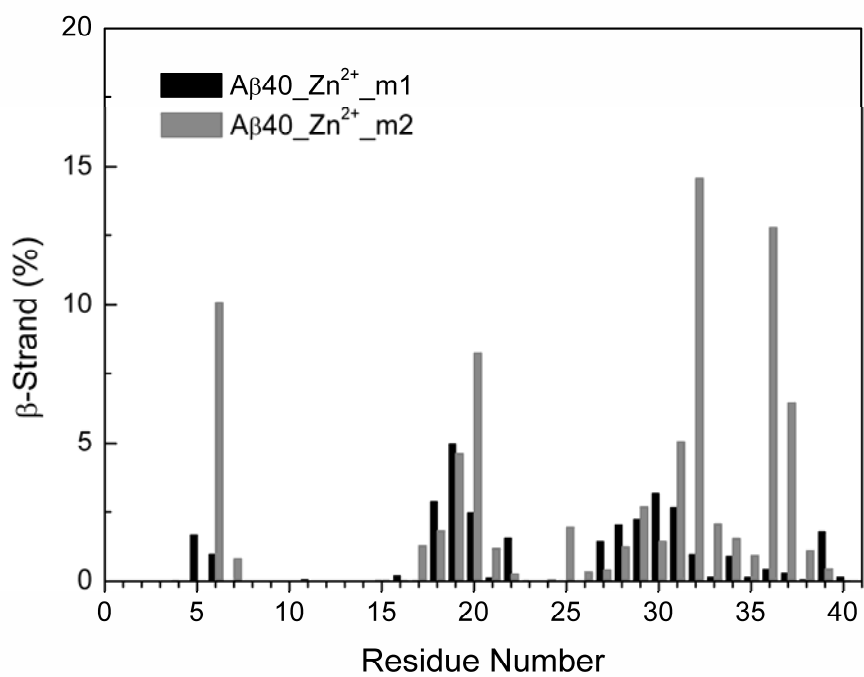

Fig. S1. The  $\beta$ -strand contents averaged over the last 100-ns REMD simulations of systems  $\text{Zn}^{2+}$ -A $\beta$ 40\_m1 and  $\text{Zn}^{2+}$ -A $\beta$ 40\_m2.

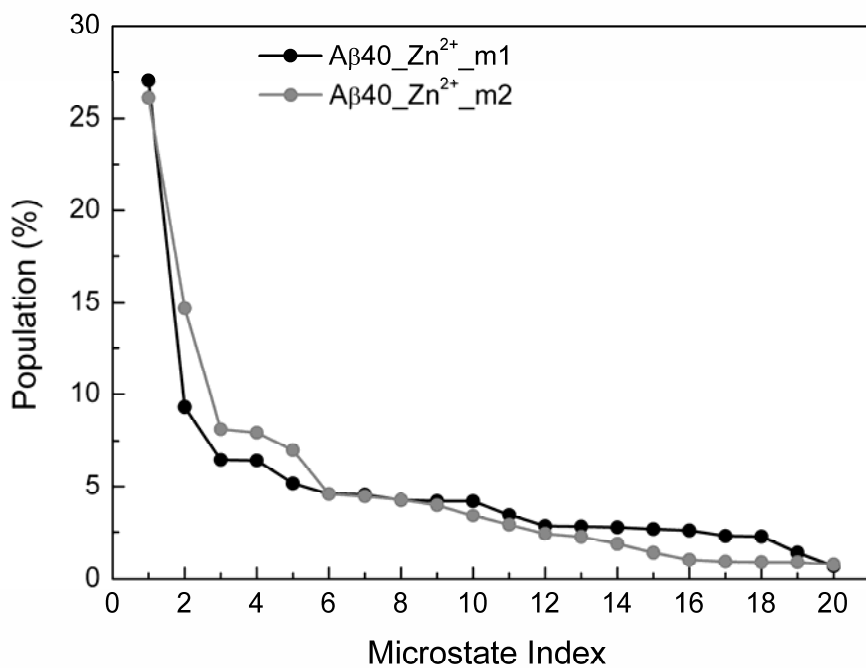

Fig. S2. The populations for the 20-node network graphs shown in Figures 6 and 7.

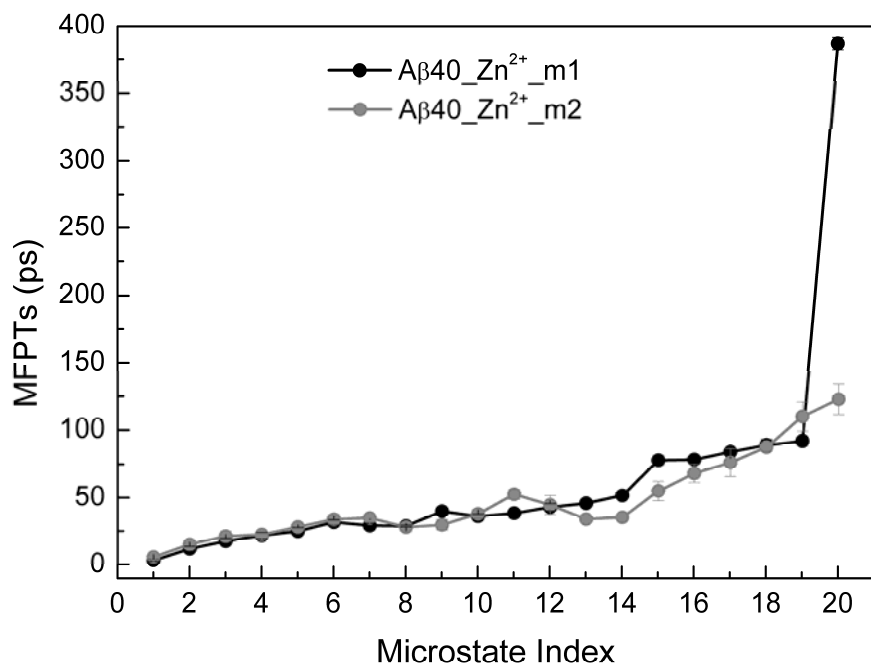

Fig. S3. The mean first passage times (MFPTs) calculated for each node in the MSM networks of two systems.

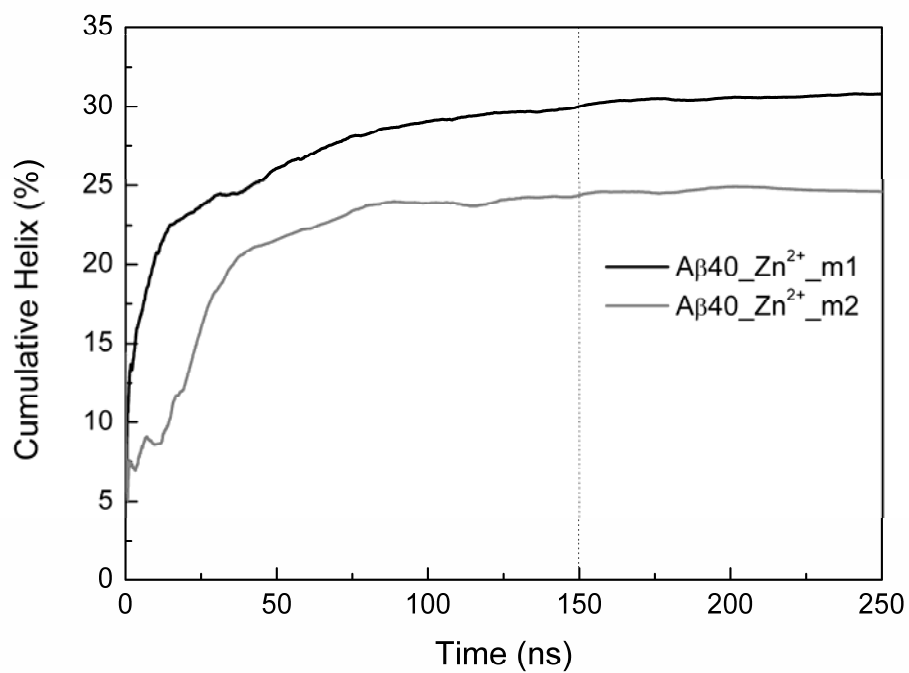

Fig. S4. The cumulative helix contents (including  $\alpha$ -helix,  $3_{10}$ -helix, and  $\pi$ -helix) over the 250-ns REMD simulations of systems Zn<sup>2+</sup>-Aβ40\_m1 and Zn<sup>2+</sup>-Aβ40\_m2.

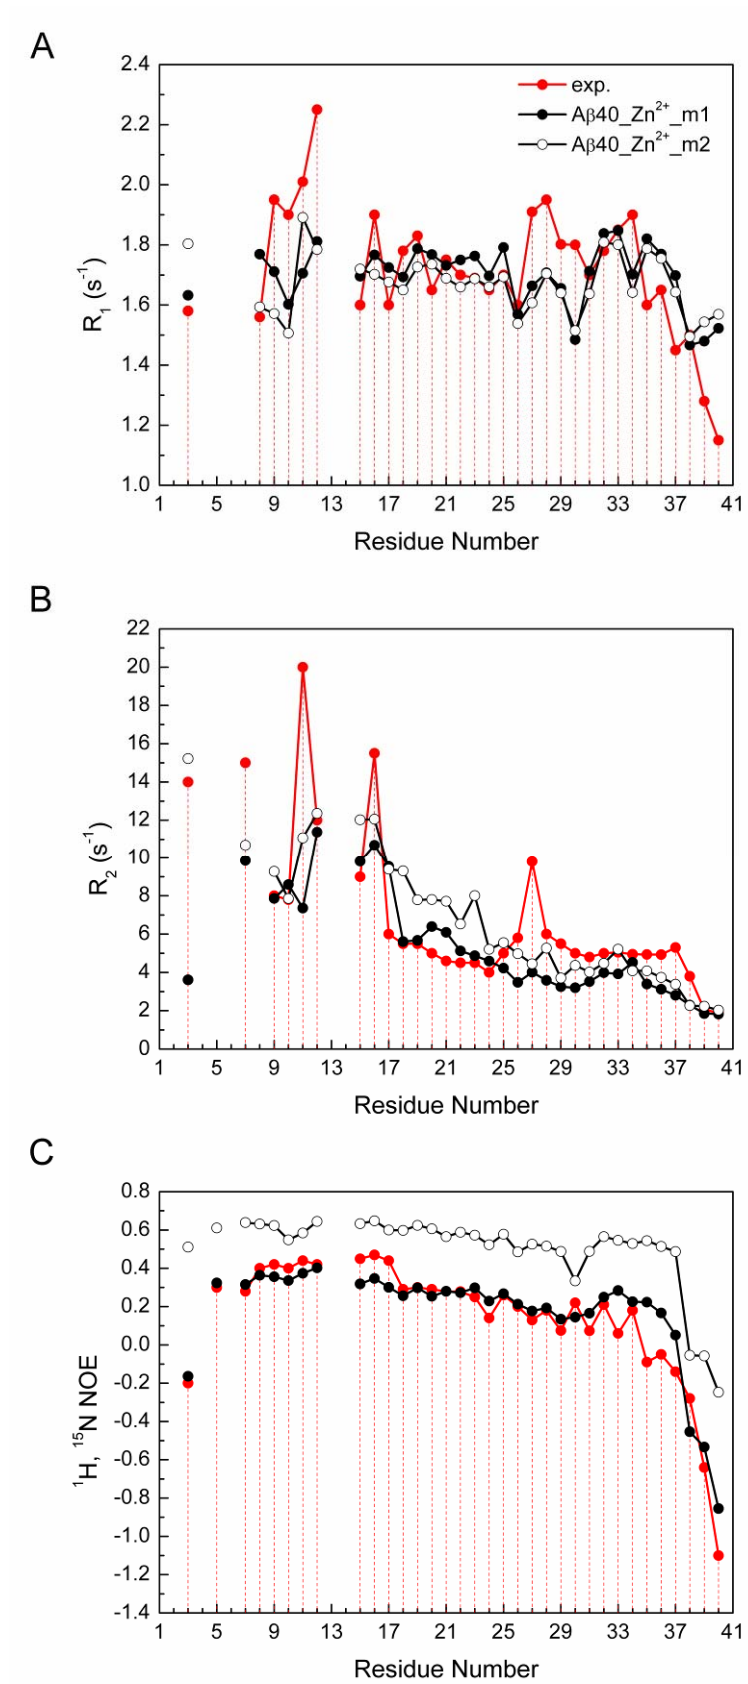

Fig. S5. Comparison of simulated and experimental  $^{15}N$  relaxation rates and NOE values for

Zn<sup>2+</sup>-Aβ40\_m1 and Zn<sup>2+</sup>-Aβ40\_m2.

Table S1. Energy components used for the calculation of the binding free energies of Zn<sup>2+</sup> to Aβ40.

| Structure   | S <sub>vibration</sub><br>(gas, 298.15 K,<br>cal mol <sup>-1</sup> K <sup>-1</sup> ) | G<br>(gas, 298.15 K,<br>Hartree) | S <sub>vibration</sub><br>(solvation, 298.15 K,<br>cal mol <sup>-1</sup> K <sup>-1</sup> ) | G<br>(solvation, 298.15 K,<br>Hartree) |
|-------------|--------------------------------------------------------------------------------------|----------------------------------|--------------------------------------------------------------------------------------------|----------------------------------------|
| model       | 181.456                                                                              | -3673.794852                     | 162.570                                                                                    | -3673.887363                           |
| structure A |                                                                                      |                                  |                                                                                            |                                        |
| model       | 169.315                                                                              | -3634.510648                     | 154.931                                                                                    | -3634.596824                           |
| structure B |                                                                                      |                                  |                                                                                            |                                        |
| His-His     | 72.984                                                                               | -945.6216361                     | 76.788                                                                                     | -945.6570515                           |
| Glu         | 30.235                                                                               | -475.7210686                     | 26.362                                                                                     | -475.8179694                           |
| Asp         | 20.702                                                                               | -436.4393052                     | 21.850                                                                                     | -436.5342886                           |
| His         | 28.889                                                                               | -473.3797251                     | 28.742                                                                                     | -473.3972433                           |
| Zn          | 38.384<br>(translational)                                                            | -1778.171976                     | 38.384<br>(translational)                                                                  | -1778.864814                           |

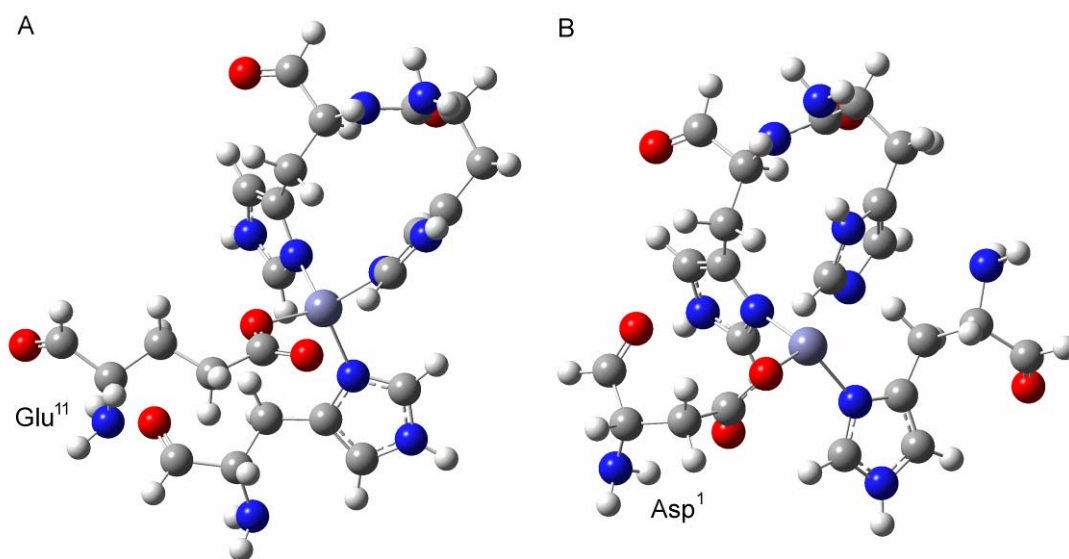

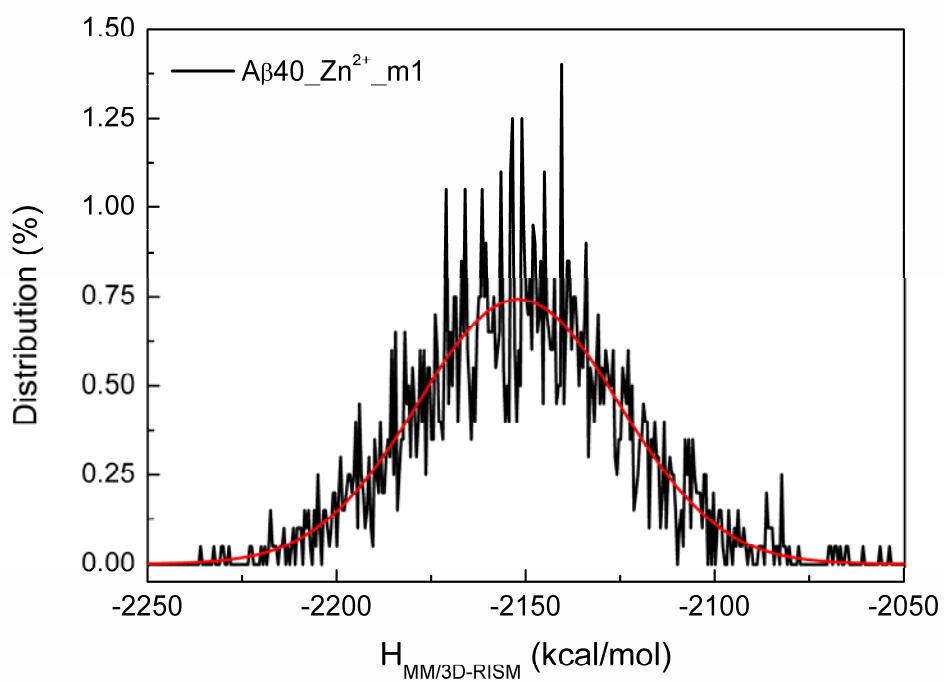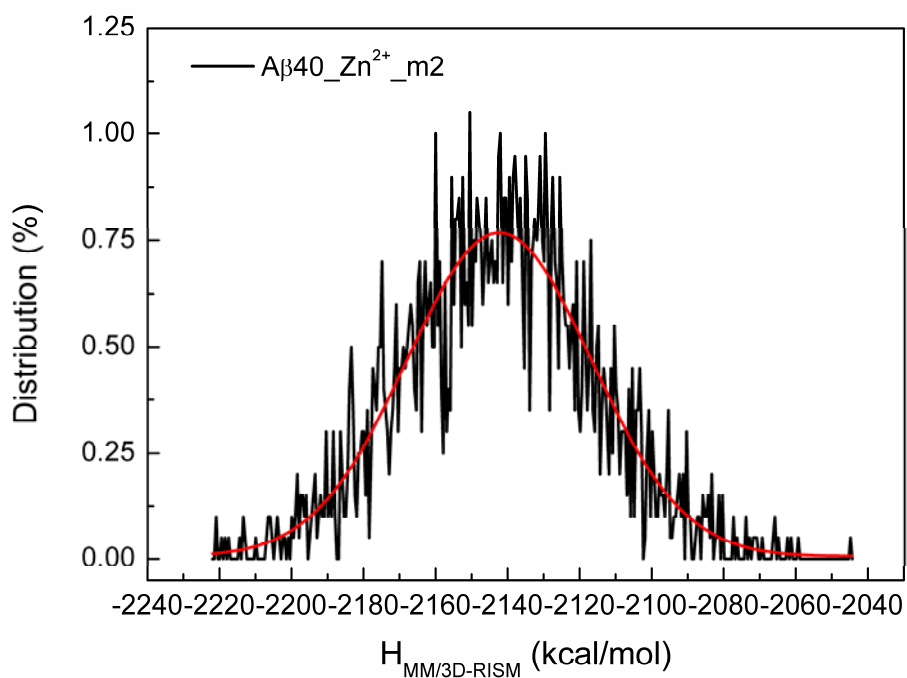

Fig. S6. The distribution of enthalpy of  $Zn^{2+}$ -bound  $A\beta_{40}$  peptides. Red curves denote the fit by Gaussian function.
